# Supplementary material
Source: PubMed Central journal article supplement (PMC6405804)
Supplement: 777397_Supplemental_Appendix.pdf [file 777397_Supplemental_Appendix.pdf]

Appendix Table 1. Associations between Cyberbullying Victimization (CV) and Mental Health Related Outcomes, Adjusted Odds Ratios (aOR) and 95% Confidence Intervals

|                                                 | <b>Suicide ideation</b> | <b>Psychological distress</b> | <b>Delinquency</b>  |
|-------------------------------------------------|-------------------------|-------------------------------|---------------------|
| <b>Cyberbullying Victimization <sup>a</sup></b> |                         |                               |                     |
| Once                                            | 1.63 (1.00-2.63)*       | 1.36 (0.92-2.05)              | 2.10 (1.50-2.96)*** |
| Twice or more                                   | 2.38 (1.59-3.56)***     | 2.20 (1.50-3.22)***           | 1.86 (1.31-2.63)**  |
| CV=1 × Female                                   | 1.12 (0.64-1.98)        | 1.78 (1.08-2.91)*             | 1.12 (0.73-1.74)    |
| CV≥2 × Female                                   | 1.93 (1.16-3.20)*       | 2.11 (1.31-3.41)**            | 1.67 (1.02-2.72)*   |
| <b>Traditional Victimization <sup>c</sup></b>   | 2.78 (1.96-3.95)***     | 3.49 (2.70-4.53)***           | 1.95 (1.58-2.41)*** |
| TV × Female                                     | 0.85 (0.54-1.32)        | 0.67 (0.48-0.93)*             | 0.89 (0.64-1.26)    |
| <b>Covariates</b>                               |                         |                               |                     |
| Age                                             | 1.14 (1.09-1.20)***     | 1.27 (1.22-1.33)***           | 1.22 (1.17-1.28)*** |
| Female <sup>b</sup>                             | 1.89 (1.45-2.45)***     | 2.53 (2.10-3.05)***           | 0.51 (0.42-0.61)*** |
| SES                                             | 0.82 (0.49-1.35)        | 0.68 (0.45-1.03)              | 0.77 (0.55-1.08)    |
| <b>Ethnicity <sup>d</sup></b>                   |                         |                               |                     |
| East & South East Asian                         | 1.76 (1.36-2.28)***     | 1.58 (1.23-2.03)***           | 0.89 (0.70-1.13)    |
| South & West Asian                              | 1.01 (0.77-1.34)**      | 1.45 (1.15-1.83)**            | 0.97 (0.79-1.20)    |
| Black                                           | 0.95 (0.66-1.39)        | 1.33 (1.00-1.77)              | 1.53 (1.15-2.03)**  |
| Aboriginal & First Nation                       | 1.61 (1.04-2.49)        | 1.40 (0.98-2.01)              | 1.35 (0.96-1.91)    |
| Latin American                                  | 1.30 (0.84-1.96)        | 1.42 (0.95-2.11)              | 1.18 (0.85-1.65)    |
| Other ethnicity                                 | 1.43 (0.96-2.12)**      | 1.65 (1.18-2.31)***           | 1.17 (0.83-1.63)    |

\*<.05, \*\*<.01, \*\*\*<.001; <sup>a</sup> Reference group is never exposed to cyberbullying victimization, <sup>b</sup> Reference group is male, <sup>c</sup> Reference group is never exposed to traditional bullying victimization, <sup>d</sup> Reference group is White.

Appendix table 2. Associations between Cyberbullying Victimization (CV) and Substance Use Related Outcomes, Adjusted Odds Ratios (aOR) and 95% Confidence Intervals

|                                          | <b>Smoking</b>      | <b>Cannabis use</b> | <b>Binge drinking</b> | <b>Non-medical drug</b> |
|------------------------------------------|---------------------|---------------------|-----------------------|-------------------------|
| Cyberbullying Victimization <sup>a</sup> |                     |                     |                       |                         |
| Once                                     | 1.43 (0.78-2.64)    | 1.01 (0.64-1.59)    | 1.50 (0.95-2.36)      | 1.37 (0.88-2.14)        |
| Twice or more                            | 1.87 (0.95-3.70)    | 1.54 (0.98-2.41)    | 1.65 (1.03-2.64)*     | 1.48 (0.93-2.37)        |
| CV=1 × Female                            | 1.37 (0.58-3.24)    | 2.05 (1.13-3.70)*   | 1.12 (0.64-1.95)      | 0.98 (0.55-1.77)        |
| CV≥2 × Female                            | 1.95 (0.75-5.07)    | 2.07 (1.11-3.87)*   | 1.08 (0.60-1.94)      | 1.11 (0.62-2.00)        |
| Traditional Victimization <sup>c</sup>   |                     |                     |                       |                         |
| TV × Female                              | 1.24 (0.76-2.02)    | 0.94 (0.68-1.30)    | 0.97 (0.70-1.36)      | 1.30 (0.95-1.78)        |
| Covariates                               |                     |                     |                       |                         |
| Age                                      | 1.62 (1.48-1.77)*** | 1.68 (1.58-1.79)*** | 2.12 (1.99-2.27)***   | 1.11 (1.05-1.17)***     |
| Female <sup>b</sup>                      | 0.57 (0.39-0.84)**  | 0.59 (0.49-0.71)*** | 0.73 (0.59-0.90)**    | 0.84 (0.67-1.05)        |
| SES                                      | 1.17 (0.59-2.29)    | 0.73 (0.47-1.15)    | 0.96 (0.62-1.49)      | 0.91 (0.57-1.46)        |
| Ethnicity <sup>d</sup>                   |                     |                     |                       |                         |
| East & South East Asian                  | 0.48 (0.26-0.89)*   | 0.37 (0.26-0.52)*** | 0.26 (0.18-0.37)***   | 1.22 (0.88-1.68)        |
| South & West Asian                       | 0.81 (0.54-1.21)    | 0.48 (0.37-0.63)*** | 0.21 (0.15-0.29)***   | 1.67 (1.28-2.16)***     |
| Black                                    | 1.13 (0.62-2.07)    | 0.67 (0.49-0.92)*   | 0.37 (0.23-0.58)***   | 1.48 (1.04-2.10)*       |
| Aboriginal & First Nation                | 1.91 (1.11-3.31)    | 1.21 (0.82-1.80)    | 1.18 (0.83-1.68)      | 1.08 (0.65-1.79)        |
| Latin American                           | 1.71 (1.05-2.81)*   | 0.73 (0.48-1.13)    | 0.57 (0.35-0.93)*     | 1.77 (1.16-2.71)**      |
| Other ethnicity                          | 1.57 (0.79-3.11)    | 0.55 (0.30-0.99)*   | 0.92 (0.55-1.54)      | 1.32 (0.85-2.05)        |

\*<.05, \*\*<.01, \*\*\*<.001 ; <sup>a</sup> Reference group is never exposed to cyberbullying victimization, <sup>b</sup> Reference group is male, <sup>c</sup> Reference group is never exposed to traditional bullying victimization, <sup>d</sup> Reference group is White.
